# Supplementary material for: Functional formamidines: pyridine substituents make an exception in the usual doubly hydrogen-bonded formamidine dimer
Source: Royal Society of Chemistry journal article supplement (doi:10.1039/b922918c), 2010-01-01
Supplement: b922918c.pdf [file b922918c.pdf]

## Functional formamidines: pyridine substituents make an exception in the usual doubly hydrogen-bonded formamidine dimer

Anne Petitjean\*, Liyan Xing, Ruiyao Wang

### Supplementary Information:

#### Content:

#### **(4Py)<sub>2</sub>F**

- p2 **Fig. S1.** a) <sup>1</sup>H NMR spectrum for **(4Py)<sub>2</sub>F** (CDCl<sub>3</sub>, 400 MHz, 25°C), b) <sup>13</sup>C NMR spectrum for **(4Py)<sub>2</sub>F** (CDCl<sub>3</sub>, 100 MHz, 25°C).
- p3 **Fig. S2.** Front view of **(4Py)<sub>2</sub>F** in the solid state (CPK and Ortep representations).  
**Fig. S3.** Hydrogen bonded network.
- p4 **Fig. S4.** Unit cell packing in **(4Py)<sub>2</sub>F** crystal structure.
- p5 **Table S1.** Crystal data and structure refinement for **(4Py)<sub>2</sub>F**.
- p6 **Table S2.** Atomic coordinates and equivalent isotropic displacement parameters, **(4Py)<sub>2</sub>F**.
- p7 **Table S3.** Bond lengths and angles for **(4Py)<sub>2</sub>F**.
- p8 **Table S4.** Anisotropic displacement parameters for **(4Py)<sub>2</sub>F**
- p9 **Table S5.** Hydrogen coordinates and isotropic displacement parameters for **(4Py)<sub>2</sub>F**.  
**Table S6.** Hydrogen bonds for **(4Py)<sub>2</sub>F**.
- p10 **Table S7.** Torsion angles for **(4Py)<sub>2</sub>F**.

#### **(2Py)<sub>2</sub>F**

- p11 **Fig. S5.** Front and side views of the **(2Py)<sub>2</sub>F** dimer in the solid state (CPK and Ortep)  
**Fig. S6.** Unit cell packing for the crystal structure of **(2Py)<sub>2</sub>F**.
- p12 **Table S8.** Crystal data and structure refinement for **(2Py)<sub>2</sub>F**
- p13 **Table S9.** Atomic coordinates, equivalent isotropic displacement parameters (**(2Py)<sub>2</sub>F**).
- p13-14 **Table S10.** Bond lengths and angles for **(2Py)<sub>2</sub>F**.
- p14-15 **Table S11:** Torsion angles for **(2Py)<sub>2</sub>F**.
- p15 **Table S12.** Hydrogen bonds for **(2Py)<sub>2</sub>F** (distances and angles).

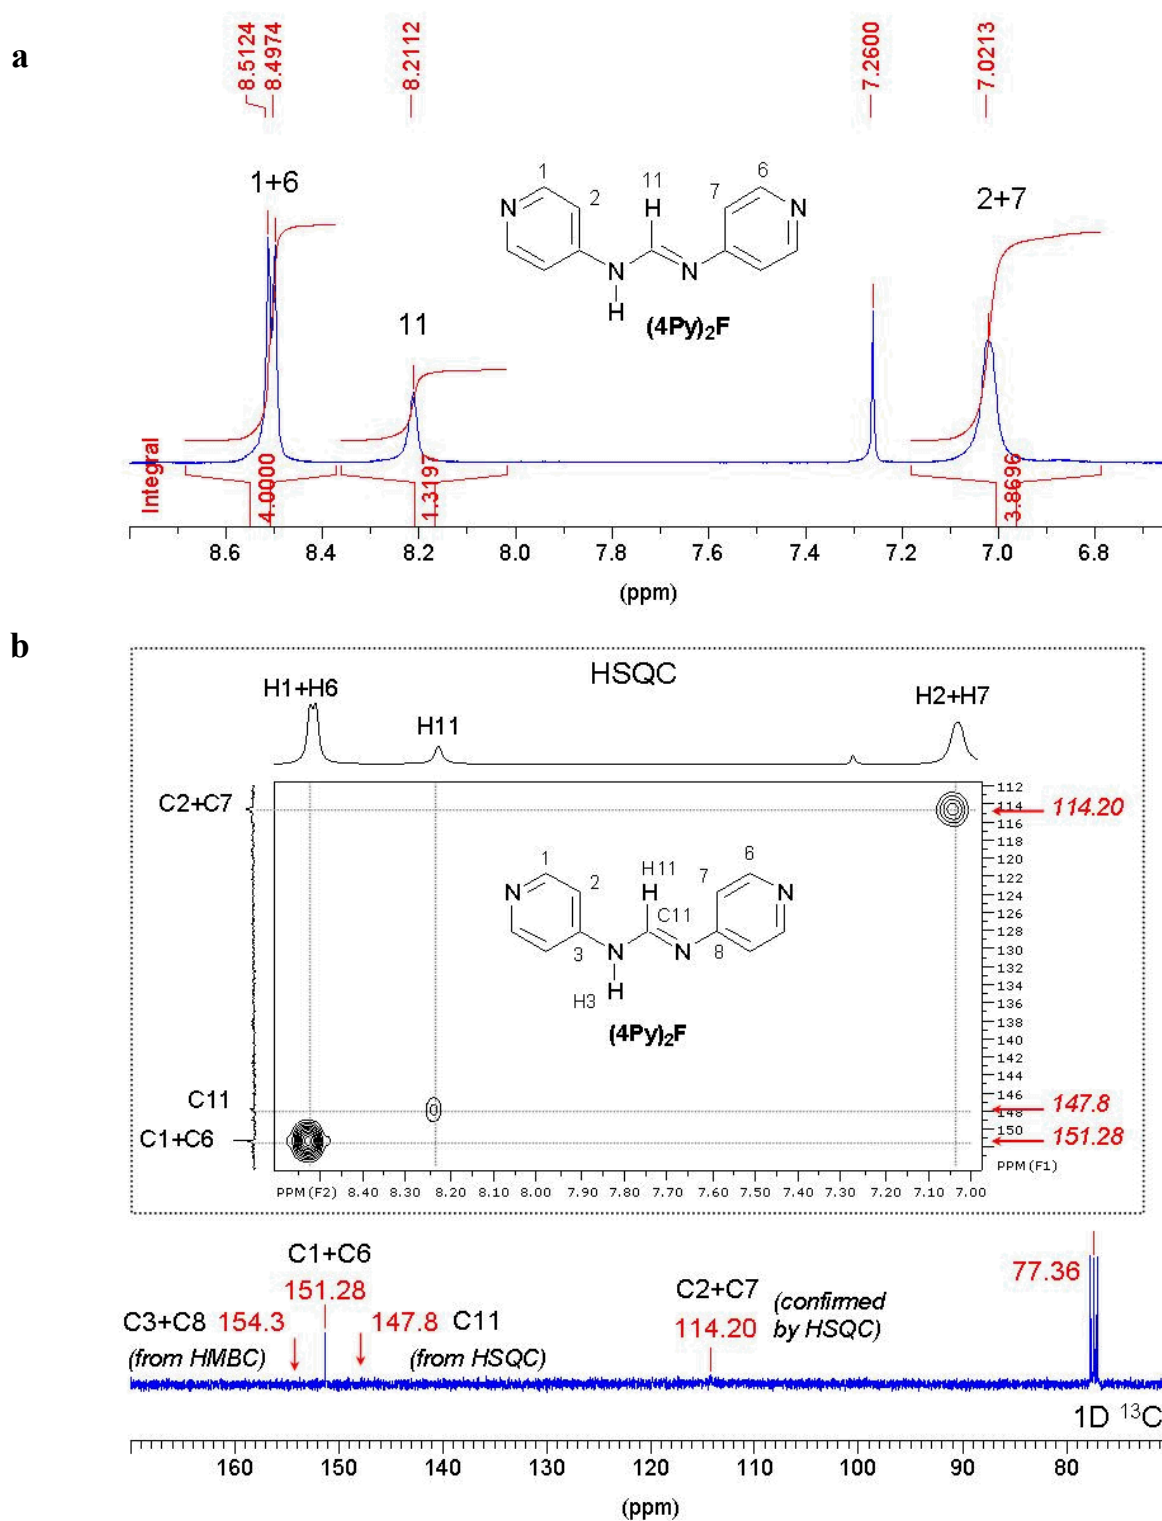

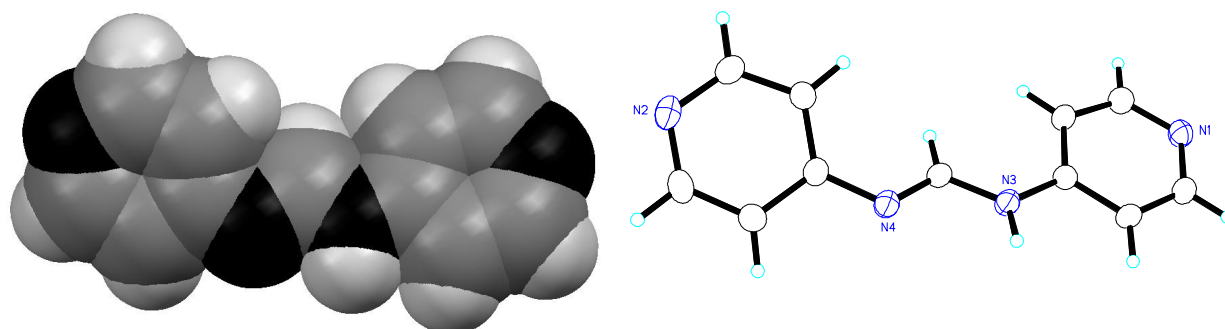

**Fig. S2:** Front view of  $(4\text{Py})_2\text{F}$  in the solid state (CPK left; Ortep right).

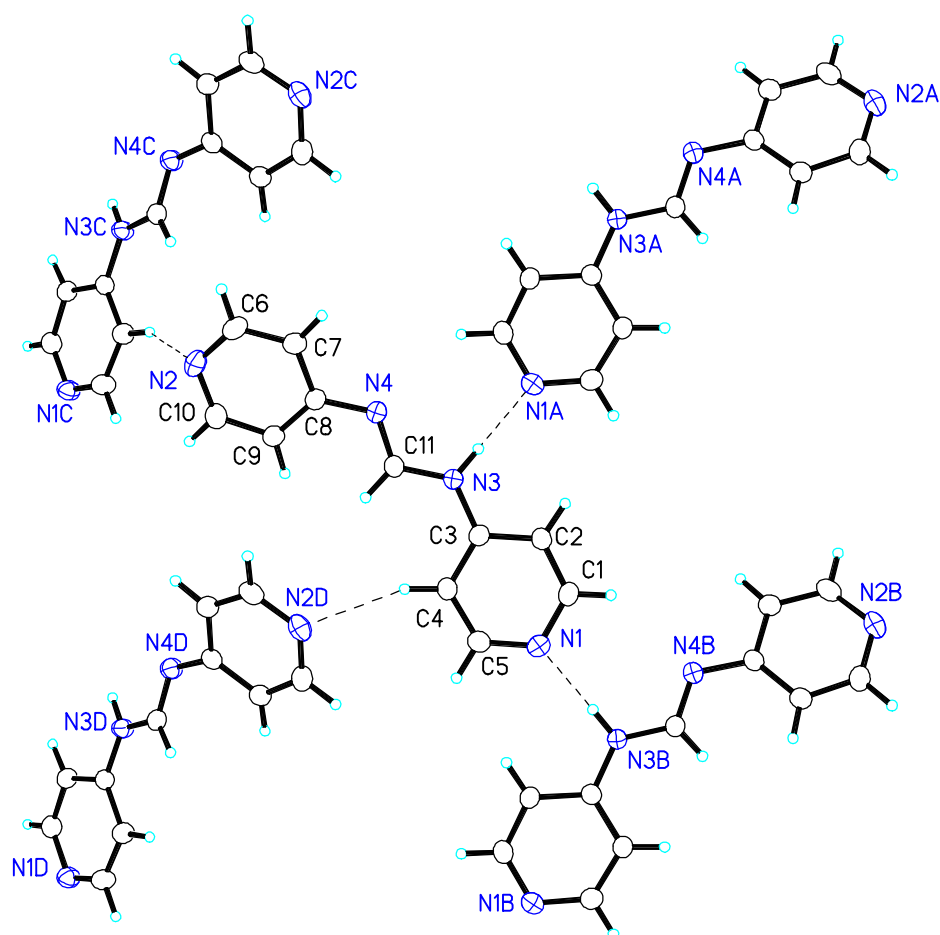

**Fig. S3:** Hydrogen bonded network for  $(4\text{Py})_2\text{F}$  in the solid state.

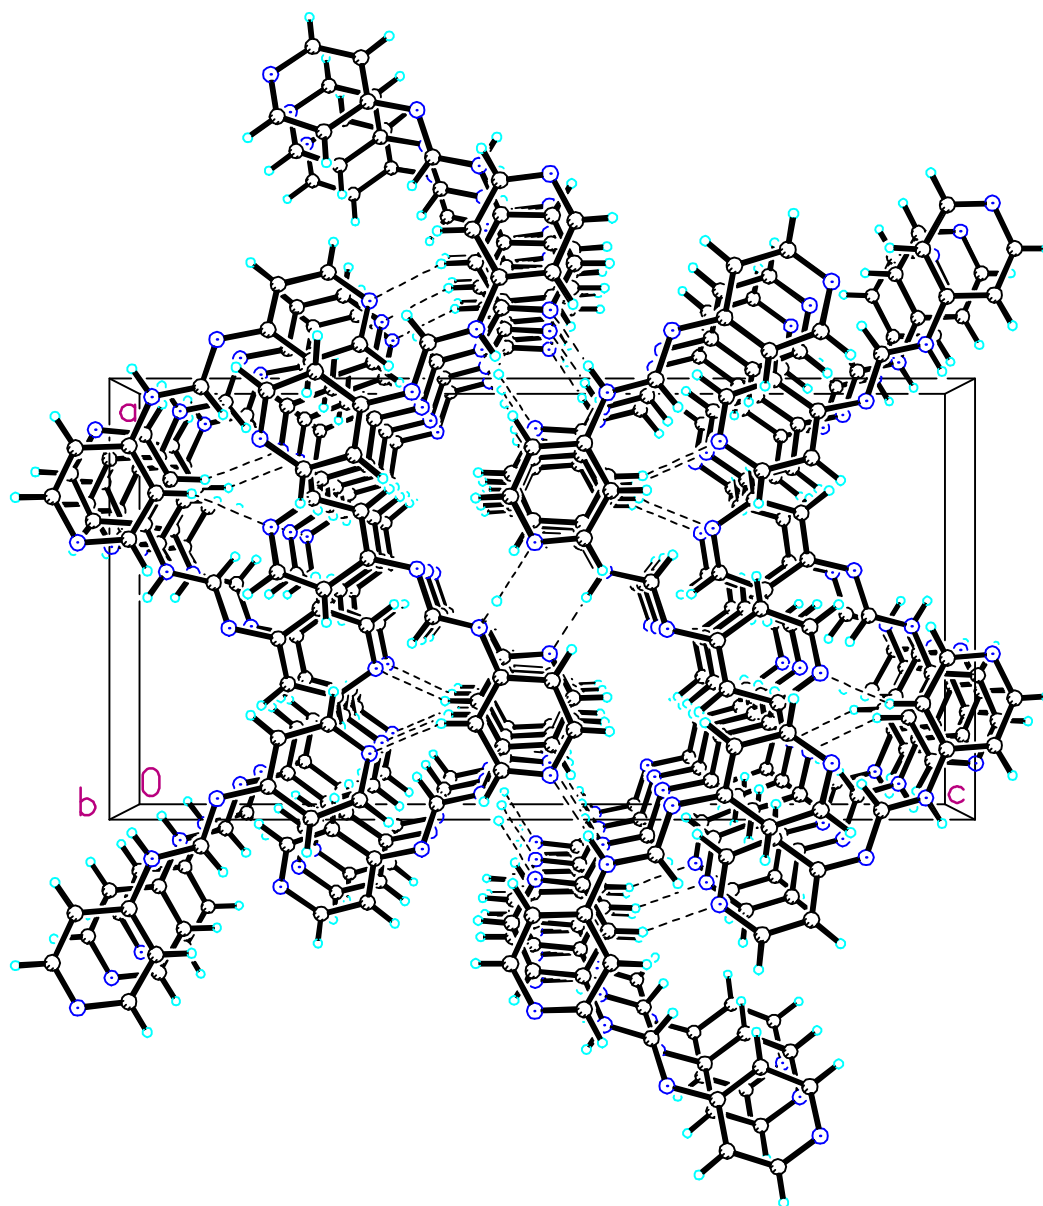

**Fig. S4:** Unit cell packing in  $(2\text{Py})_2\text{F}$  crystal structure.

**Table S1. Crystal data and structure refinement for ap11**

|                                   |                                             |                       |
|-----------------------------------|---------------------------------------------|-----------------------|
| Identification code               | ap11                                        |                       |
| Empirical formula                 | C11 H10 N4                                  |                       |
| Formula weight                    | 198.23                                      |                       |
| Temperature                       | 180(2) K                                    |                       |
| Wavelength                        | 0.71073 Å                                   |                       |
| Crystal system                    | Orthorhombic                                |                       |
| Space group                       | Pbca                                        |                       |
| Unit cell dimensions              | a = 11.7861(5) Å                            | $\alpha = 90^\circ$ . |
|                                   | b = 7.2290(3) Å                             | $\beta = 90^\circ$ .  |
|                                   | c = 23.2069(9) Å                            | $\gamma = 90^\circ$ . |
| Volume                            | 1977.27(14) Å <sup>3</sup>                  |                       |
| Z                                 | 8                                           |                       |
| Density (calculated)              | 1.332 Mg/m <sup>3</sup>                     |                       |
| Absorption coefficient            | 0.085 mm <sup>-1</sup>                      |                       |
| F(000)                            | 832                                         |                       |
| Crystal size                      | 0.25 x 0.25 x 0.20 mm <sup>3</sup>          |                       |
| Theta range for data collection   | 2.46 to 25.99°.                             |                       |
| Index ranges                      | -14 ≤ h ≤ 11, -8 ≤ k ≤ 8, -28 ≤ l ≤ 28      |                       |
| Reflections collected             | 6973                                        |                       |
| Independent reflections           | 1938 [R(int) = 0.0156]                      |                       |
| Completeness to theta = 25.99°    | 99.8 %                                      |                       |
| Absorption correction             | Multi-scan                                  |                       |
| Max. and min. transmission        | 0.9831 and 0.9790                           |                       |
| Refinement method                 | Full-matrix least-squares on F <sup>2</sup> |                       |
| Data / restraints / parameters    | 1938 / 0 / 141                              |                       |
| Goodness-of-fit on F <sup>2</sup> | 1.059                                       |                       |
| Final R indices [I > 2σ(I)]       | R1 = 0.0322, wR2 = 0.0855                   |                       |
| R indices (all data)              | R1 = 0.0357, wR2 = 0.0893                   |                       |
| Extinction coefficient            | 0.0100(12)                                  |                       |
| Largest diff. peak and hole       | 0.183 and -0.147 e.Å <sup>-3</sup>          |                       |

**Table S2. Atomic coordinates (  $\times 10^4$ ) and equivalent isotropic displacement parameters ( $\text{\AA}^2 \times 10^3$ ) for ap11.** U(eq) is defined as one third of the trace of the orthogonalized  $U^{ij}$  tensor.

|       | x        | y        | z       | U(eq) |
|-------|----------|----------|---------|-------|
| N(1)  | 3784(1)  | 2024(1)  | 5082(1) | 29(1) |
| N(2)  | -1591(1) | -1465(1) | 1946(1) | 30(1) |
| N(3)  | 618(1)   | 1176(1)  | 4302(1) | 26(1) |
| N(4)  | -657(1)  | 348(1)   | 3609(1) | 28(1) |
| C(1)  | 2799(1)  | 2371(2)  | 5349(1) | 28(1) |
| C(2)  | 1752(1)  | 2058(2)  | 5107(1) | 26(1) |
| C(3)  | 1686(1)  | 1383(2)  | 4544(1) | 23(1) |
| C(4)  | 2702(1)  | 989(2)   | 4262(1) | 26(1) |
| C(5)  | 3703(1)  | 1319(2)  | 4549(1) | 30(1) |
| C(6)  | -2234(1) | -1740(2) | 2413(1) | 29(1) |
| C(7)  | -1937(1) | -1201(2) | 2964(1) | 28(1) |
| C(8)  | -900(1)  | -317(2)  | 3057(1) | 24(1) |
| C(9)  | -213(1)  | -42(2)   | 2572(1) | 25(1) |
| C(10) | -595(1)  | -631(2)  | 2040(1) | 29(1) |
| C(11) | 374(1)   | 411(2)   | 3784(1) | 24(1) |

**Table S3: Bond lengths [Å] and angles [°] for ap11.**

|                  |            |                   |            |
|------------------|------------|-------------------|------------|
| N(1)-C(1)        | 1.3390(14) | N(1)-C(1)-H(1A)   | 118.0      |
| N(1)-C(5)        | 1.3422(14) | C(2)-C(1)-H(1A)   | 118.0      |
| N(2)-C(10)       | 1.3374(15) | C(1)-C(2)-C(3)    | 119.24(10) |
| N(2)-C(6)        | 1.3383(15) | C(1)-C(2)-H(2A)   | 120.4      |
| N(3)-C(11)       | 1.3544(13) | C(3)-C(2)-H(2A)   | 120.4      |
| N(3)-C(3)        | 1.3867(13) | N(3)-C(3)-C(4)    | 124.57(9)  |
| N(3)-H(3N)       | 0.900(14)  | N(3)-C(3)-C(2)    | 117.86(9)  |
| N(4)-C(11)       | 1.2824(14) | C(4)-C(3)-C(2)    | 117.56(10) |
| N(4)-C(8)        | 1.3983(13) | C(5)-C(4)-C(3)    | 118.33(10) |
| C(1)-C(2)        | 1.3734(15) | C(5)-C(4)-H(4A)   | 120.8      |
| C(1)-H(1A)       | 0.9500     | C(3)-C(4)-H(4A)   | 120.8      |
| C(2)-C(3)        | 1.3972(14) | N(1)-C(5)-C(4)    | 124.97(10) |
| C(2)-H(2A)       | 0.9500     | N(1)-C(5)-H(5A)   | 117.5      |
| C(3)-C(4)        | 1.3932(15) | C(4)-C(5)-H(5A)   | 117.5      |
| C(4)-C(5)        | 1.3753(15) | N(2)-C(6)-C(7)    | 124.37(10) |
| C(4)-H(4A)       | 0.9500     | N(2)-C(6)-H(6A)   | 117.8      |
| C(5)-H(5A)       | 0.9500     | C(7)-C(6)-H(6A)   | 117.8      |
| C(6)-C(7)        | 1.3811(15) | C(6)-C(7)-C(8)    | 119.59(10) |
| C(6)-H(6A)       | 0.9500     | C(6)-C(7)-H(7A)   | 120.2      |
| C(7)-C(8)        | 1.3958(15) | C(8)-C(7)-H(7A)   | 120.2      |
| C(7)-H(7A)       | 0.9500     | C(7)-C(8)-N(4)    | 118.57(10) |
| C(8)-C(9)        | 1.4006(15) | C(7)-C(8)-C(9)    | 116.57(9)  |
| C(9)-C(10)       | 1.3817(15) | N(4)-C(8)-C(9)    | 124.67(10) |
| C(9)-H(9A)       | 0.9500     | C(10)-C(9)-C(8)   | 119.07(10) |
| C(10)-H(10A)     | 0.9500     | C(10)-C(9)-H(9A)  | 120.5      |
| C(11)-H(11A)     | 0.9500     | C(8)-C(9)-H(9A)   | 120.5      |
|                  |            | N(2)-C(10)-C(9)   | 124.79(10) |
| C(1)-N(1)-C(5)   | 115.75(9)  | N(2)-C(10)-H(10A) | 117.6      |
| C(10)-N(2)-C(6)  | 115.59(9)  | C(9)-C(10)-H(10A) | 117.6      |
| C(11)-N(3)-C(3)  | 126.65(9)  | N(4)-C(11)-N(3)   | 119.79(10) |
| C(11)-N(3)-H(3N) | 117.2(9)   | N(4)-C(11)-H(11A) | 120.1      |
| C(3)-N(3)-H(3N)  | 116.0(9)   | N(3)-C(11)-H(11A) | 120.1      |
| C(11)-N(4)-C(8)  | 119.76(9)  |                   |            |
| N(1)-C(1)-C(2)   | 124.08(10) |                   |            |

**Table S4. Anisotropic displacement parameters ( $\text{\AA}^2 \times 10^3$ ) for ap11.**

The anisotropic displacement factor exponent takes the form:  $-2\pi^2 [h^2 a^{*2} U^{11} + \dots + 2 h k a^* b^* U^{12}]$

|       | U <sup>11</sup> | U <sup>22</sup> | U <sup>33</sup> | U <sup>23</sup> | U <sup>13</sup> | U <sup>12</sup> |
|-------|-----------------|-----------------|-----------------|-----------------|-----------------|-----------------|
| N(1)  | 24(1)           | 35(1)           | 29(1)           | -3(1)           | -3(1)           | -2(1)           |
| N(2)  | 36(1)           | 29(1)           | 26(1)           | -1(1)           | -8(1)           | 1(1)            |
| N(3)  | 21(1)           | 36(1)           | 21(1)           | -4(1)           | 0(1)            | 1(1)            |
| N(4)  | 24(1)           | 38(1)           | 22(1)           | -4(1)           | -1(1)           | -1(1)           |
| C(1)  | 29(1)           | 32(1)           | 21(1)           | -2(1)           | -2(1)           | -2(1)           |
| C(2)  | 25(1)           | 31(1)           | 21(1)           | -1(1)           | 2(1)            | 0(1)            |
| C(3)  | 23(1)           | 24(1)           | 21(1)           | 1(1)            | -1(1)           | 0(1)            |
| C(4)  | 26(1)           | 30(1)           | 23(1)           | -4(1)           | 1(1)            | 0(1)            |
| C(5)  | 24(1)           | 34(1)           | 31(1)           | -5(1)           | 1(1)            | 1(1)            |
| C(6)  | 27(1)           | 26(1)           | 34(1)           | 0(1)            | -9(1)           | -1(1)           |
| C(7)  | 24(1)           | 32(1)           | 27(1)           | 2(1)            | -1(1)           | -1(1)           |
| C(8)  | 23(1)           | 25(1)           | 22(1)           | 0(1)            | -3(1)           | 3(1)            |
| C(9)  | 23(1)           | 25(1)           | 26(1)           | 0(1)            | -2(1)           | 0(1)            |
| C(10) | 35(1)           | 29(1)           | 23(1)           | 1(1)            | 0(1)            | 1(1)            |
| C(11) | 25(1)           | 27(1)           | 20(1)           | 0(1)            | 1(1)            | -1(1)           |



**Table S5. Hydrogen coordinates ( $\times 10^4$ ) and isotropic displacement parameters ( $\text{\AA}^2 \times 10^3$ ) for ap11.**

|        | x      | y        | z       | U(eq) |
|--------|--------|----------|---------|-------|
| H(3N)  | 38(12) | 1670(20) | 4502(5) | 37(4) |
| H(1A)  | 2825   | 2863     | 5728    | 33    |
| H(2A)  | 1080   | 2297     | 5321    | 31    |
| H(4A)  | 2703   | 505      | 3882    | 32    |
| H(5A)  | 4389   | 1024     | 4355    | 35    |
| H(6A)  | -2942  | -2346    | 2363    | 35    |
| H(7A)  | -2436  | -1430    | 3278    | 33    |
| H(9A)  | 505    | 542      | 2608    | 30    |
| H(10A) | -115   | -428     | 1717    | 35    |
| H(11A) | 965    | -78      | 3551    | 28    |

**Table S6. Hydrogen bonds for ap11 [ $\text{\AA}$  and  $^\circ$ ].**

| D-H...A             | d(D-H)    | d(H...A)  | d(D...A)   | $\angle(\text{DHA})$ |
|---------------------|-----------|-----------|------------|----------------------|
| N(3)-H(3N)...N(1)#1 | 0.900(14) | 2.001(15) | 2.8996(13) | 175.2(13)            |
| C(4)-H(4A)...N(2)#2 | 0.95      | 2.53      | 3.4212(14) | 155.9                |

Symmetry transformations used to generate equivalent atoms:

#1  $x-1/2, -y+1/2, -z+1$  #2  $x+1/2, y, -z+1/2$

**Table S7. Torsion angles [°] for ap11.**

---

|                      |             |
|----------------------|-------------|
| C(5)-N(1)-C(1)-C(2)  | -0.39(17)   |
| N(1)-C(1)-C(2)-C(3)  | -1.80(18)   |
| C(11)-N(3)-C(3)-C(4) | 6.61(18)    |
| C(11)-N(3)-C(3)-C(2) | -174.32(10) |
| C(1)-C(2)-C(3)-N(3)  | -176.59(10) |
| C(1)-C(2)-C(3)-C(4)  | 2.54(16)    |
| N(3)-C(3)-C(4)-C(5)  | 177.86(11)  |
| C(2)-C(3)-C(4)-C(5)  | -1.21(16)   |
| C(1)-N(1)-C(5)-C(4)  | 1.88(18)    |
| C(3)-C(4)-C(5)-N(1)  | -1.07(18)   |
| C(10)-N(2)-C(6)-C(7) | 0.95(17)    |
| N(2)-C(6)-C(7)-C(8)  | -0.46(18)   |
| C(6)-C(7)-C(8)-N(4)  | 174.94(10)  |
| C(6)-C(7)-C(8)-C(9)  | -0.33(16)   |
| C(11)-N(4)-C(8)-C(7) | 149.62(11)  |
| C(11)-N(4)-C(8)-C(9) | -35.52(16)  |
| C(7)-C(8)-C(9)-C(10) | 0.56(15)    |
| N(4)-C(8)-C(9)-C(10) | -174.39(10) |
| C(6)-N(2)-C(10)-C(9) | -0.69(17)   |
| C(8)-C(9)-C(10)-N(2) | -0.05(17)   |
| C(8)-N(4)-C(11)-N(3) | 175.33(10)  |
| C(3)-N(3)-C(11)-N(4) | -178.47(11) |

---

Symmetry transformations used to generate equivalent atoms:

#1  $x-1/2, -y+1/2, -z+1$  #2  $x+1/2, y, -z+1/2$

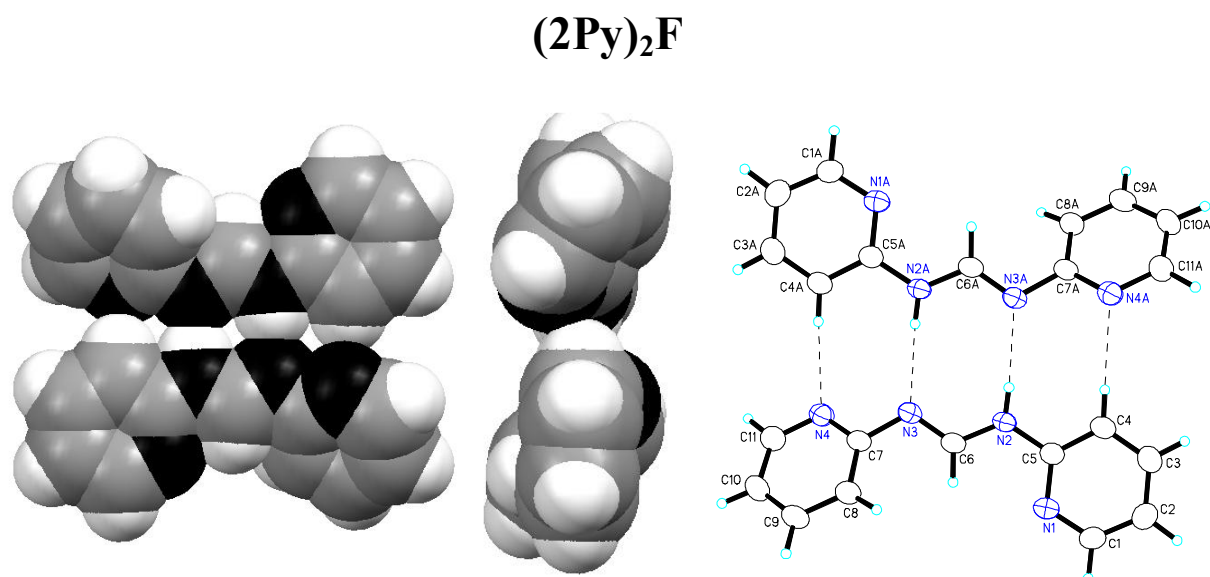

**Fig. S5:** Front (left) and side (middle) views of the **(2Py)<sub>2</sub>F** in the solid state (CPK representation). Note the twist in the side view. Ortep representation of the **(2Py)<sub>2</sub>F** dimer (right).

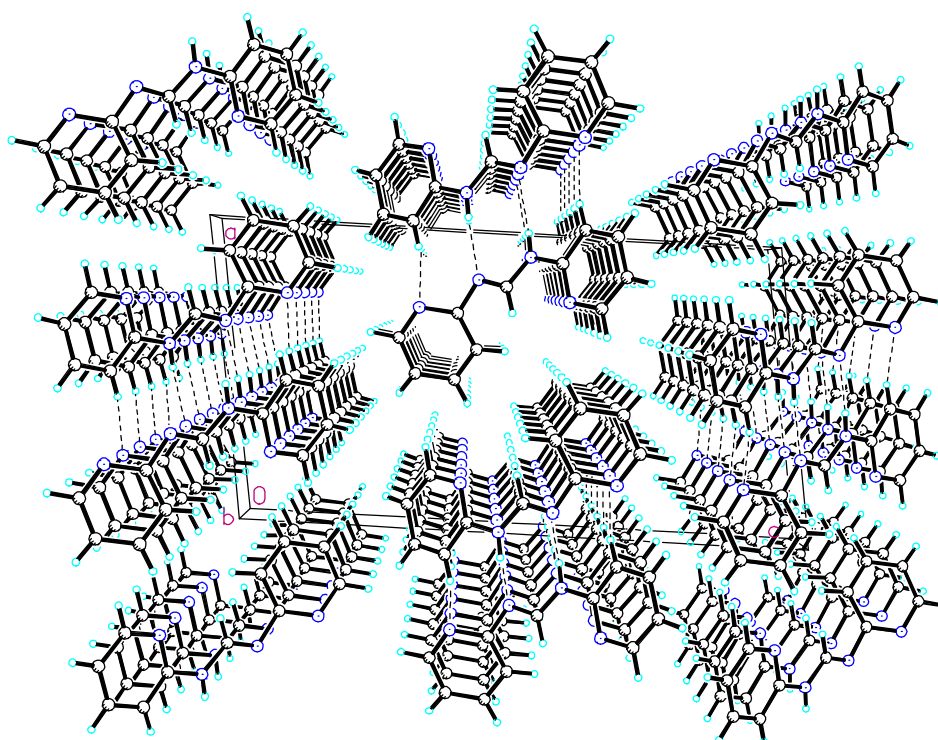

**Fig. S6:** Unit cell packing in **(2Py)<sub>2</sub>F** crystal structure.

**Table S8. Crystal data and structure refinement for ap04t**

|                                   |                                                                                                                                 |
|-----------------------------------|---------------------------------------------------------------------------------------------------------------------------------|
| Identification code               | ap04t                                                                                                                           |
| Empirical formula                 | C11 H10 N4                                                                                                                      |
| Formula weight                    | 198.23                                                                                                                          |
| Temperature                       | 180(2) K                                                                                                                        |
| Wavelength                        | 0.71073 Å                                                                                                                       |
| Crystal system                    | Monoclinic                                                                                                                      |
| Space group                       | P2/n                                                                                                                            |
| Unit cell dimensions              | a = 10.9881(19) Å $\alpha = 90^\circ$ .<br>b = 4.3351(7) Å $\beta = 98.561(3)^\circ$ .<br>c = 20.561(4) Å $\gamma = 90^\circ$ . |
| Volume                            | 968.5(3) Å <sup>3</sup>                                                                                                         |
| Z                                 | 4                                                                                                                               |
| Density (calculated)              | 1.360 Mg/m <sup>3</sup>                                                                                                         |
| Absorption coefficient            | 0.087 mm <sup>-1</sup>                                                                                                          |
| F(000)                            | 416                                                                                                                             |
| Crystal size                      | 0.35 x 0.25 x 0.15 mm <sup>3</sup>                                                                                              |
| Theta range for data collection   | 1.99 to 25.99°.                                                                                                                 |
| Index ranges                      | -11 ≤ h ≤ 13, -5 ≤ k ≤ 5, -25 ≤ l ≤ 25                                                                                          |
| Reflections collected             | 5802                                                                                                                            |
| Independent reflections           | 1911 [R(int) = 0.0399]                                                                                                          |
| Completeness to theta = 25.99°    | 100.0 %                                                                                                                         |
| Absorption correction             | Multi-scan                                                                                                                      |
| Max. and min. transmission        | 0.9870 and 0.9701                                                                                                               |
| Refinement method                 | Full-matrix least-squares on F <sup>2</sup>                                                                                     |
| Data / restraints / parameters    | 1911 / 0 / 176                                                                                                                  |
| Goodness-of-fit on F <sup>2</sup> | 0.973                                                                                                                           |
| Final R indices [I > 2σ(I)]       | R1 = 0.0331, wR2 = 0.0843                                                                                                       |
| R indices (all data)              | R1 = 0.0436, wR2 = 0.0893                                                                                                       |
| Largest diff. peak and hole       | 0.143 and -0.168 e.Å <sup>-3</sup>                                                                                              |

**Table S9. Atomic coordinates (  $\times 10^4$  ) and equivalent isotropic displacement parameters ( $\text{\AA}^2 \times 10^3$ ) for ap04t.**  $U(\text{eq})$  is defined as one third of the trace of the orthogonalized  $U^{\text{ij}}$  tensor.

|       | x       | y        | z       | $U(\text{eq})$ |
|-------|---------|----------|---------|----------------|
| N(1)  | 2182(1) | -867(2)  | 3993(1) | 34(1)          |
| N(2)  | 884(1)  | 2169(2)  | 4529(1) | 32(1)          |
| N(3)  | 1656(1) | 5298(2)  | 5402(1) | 32(1)          |
| N(4)  | 2605(1) | 7000(2)  | 6422(1) | 39(1)          |
| C(1)  | 2309(1) | -2904(3) | 3516(1) | 37(1)          |
| C(2)  | 1349(1) | -4103(3) | 3088(1) | 39(1)          |
| C(3)  | 165(1)  | -3168(3) | 3156(1) | 39(1)          |
| C(4)  | 2(1)    | -1087(3) | 3637(1) | 35(1)          |
| C(5)  | 1035(1) | 17(2)    | 4043(1) | 30(1)          |
| C(6)  | 1820(1) | 3301(2)  | 4962(1) | 31(1)          |
| C(7)  | 2727(1) | 6418(2)  | 5796(1) | 32(1)          |
| C(8)  | 3815(1) | 7037(3)  | 5542(1) | 36(1)          |
| C(9)  | 4806(1) | 8221(3)  | 5957(1) | 41(1)          |
| C(10) | 4694(1) | 8790(3)  | 6604(1) | 43(1)          |
| C(11) | 3586(1) | 8164(3)  | 6810(1) | 43(1)          |

**Table S10. Bond lengths [ $\text{\AA}$ ] and angles [ $^\circ$ ] for ap04t**

|            |            |                 |            |
|------------|------------|-----------------|------------|
| N(1)-C(5)  | 1.3365(14) | C(5)-N(1)-C(1)  | 116.60(10) |
| N(1)-C(1)  | 1.3408(16) | C(6)-N(2)-C(5)  | 123.72(10) |
| N(2)-C(6)  | 1.3476(15) | C(6)-N(2)-H(2N) | 119.8(9)   |
| N(2)-C(5)  | 1.3950(15) | C(5)-N(2)-H(2N) | 116.3(9)   |
| N(2)-H(2N) | 0.850(14)  | C(6)-N(3)-C(7)  | 116.31(10) |
| N(3)-C(6)  | 1.2847(15) | C(7)-N(4)-C(11) | 117.22(11) |
| N(3)-C(7)  | 1.4119(14) | N(1)-C(1)-C(2)  | 124.35(12) |
| N(4)-C(7)  | 1.3383(15) | N(1)-C(1)-H(1)  | 116.7(7)   |
| N(4)-C(11) | 1.3409(16) | C(2)-C(1)-H(1)  | 119.0(7)   |
| C(1)-C(2)  | 1.3720(18) | C(1)-C(2)-C(3)  | 117.85(12) |
| C(1)-H(1)  | 0.976(14)  | C(1)-C(2)-H(2)  | 120.4(7)   |
| C(2)-C(3)  | 1.3888(18) | C(3)-C(2)-H(2)  | 121.8(7)   |
| C(2)-H(2)  | 0.984(13)  | C(4)-C(3)-C(2)  | 119.38(12) |
| C(3)-C(4)  | 1.3697(17) | C(4)-C(3)-H(3)  | 118.0(8)   |

|                                                                |            |                   |            |
|----------------------------------------------------------------|------------|-------------------|------------|
| C(3)-H(3)                                                      | 0.952(14)  | C(2)-C(3)-H(3)    | 122.6(8)   |
| C(4)-C(5)                                                      | 1.3907(16) | C(3)-C(4)-C(5)    | 118.47(11) |
| C(4)-H(4)                                                      | 0.919(13)  | C(3)-C(4)-H(4)    | 122.1(8)   |
| C(6)-H(6)                                                      | 0.964(11)  | C(5)-C(4)-H(4)    | 119.4(8)   |
| C(7)-C(8)                                                      | 1.3992(16) | N(1)-C(5)-C(4)    | 123.35(11) |
| C(8)-C(9)                                                      | 1.3787(17) | N(1)-C(5)-N(2)    | 117.53(10) |
| C(8)-H(8)                                                      | 0.956(12)  | C(4)-C(5)-N(2)    | 119.11(10) |
| C(9)-C(10)                                                     | 1.3757(18) | N(3)-C(6)-N(2)    | 122.45(11) |
| C(9)-H(9)                                                      | 0.959(13)  | N(3)-C(6)-H(6)    | 124.3(6)   |
| C(10)-C(11)                                                    | 1.3744(18) | N(2)-C(6)-H(6)    | 113.2(6)   |
| C(10)-H(10)                                                    | 0.945(14)  | N(4)-C(7)-C(8)    | 122.37(11) |
| C(11)-H(11)                                                    | 0.998(13)  | N(4)-C(7)-N(3)    | 114.99(10) |
|                                                                |            | C(8)-C(7)-N(3)    | 122.56(11) |
| Symmetry transformations used to generate<br>equivalent atoms. |            | C(9)-C(8)-C(7)    | 118.77(12) |
|                                                                |            | C(9)-C(8)-H(8)    | 122.3(7)   |
|                                                                |            | C(7)-C(8)-H(8)    | 118.8(7)   |
|                                                                |            | C(10)-C(9)-C(8)   | 119.23(12) |
|                                                                |            | C(10)-C(9)-H(9)   | 121.7(8)   |
|                                                                |            | C(8)-C(9)-H(9)    | 119.0(8)   |
|                                                                |            | C(11)-C(10)-C(9)  | 118.31(12) |
|                                                                |            | C(11)-C(10)-H(10) | 119.8(8)   |
|                                                                |            | C(9)-C(10)-H(10)  | 121.9(8)   |
|                                                                |            | N(4)-C(11)-C(10)  | 124.09(12) |
|                                                                |            | N(4)-C(11)-H(11)  | 115.2(8)   |
|                                                                |            | C(10)-C(11)-H(11) | 120.8(8)   |

**Table S11. Torsion angles [°] for ap04t.**

|                     |             |
|---------------------|-------------|
| C(5)-N(1)-C(1)-C(2) | 0.01(17)    |
| N(1)-C(1)-C(2)-C(3) | -0.60(18)   |
| C(1)-C(2)-C(3)-C(4) | 0.64(17)    |
| C(2)-C(3)-C(4)-C(5) | -0.12(17)   |
| C(1)-N(1)-C(5)-C(4) | 0.57(16)    |
| C(1)-N(1)-C(5)-N(2) | -179.08(10) |
| C(3)-C(4)-C(5)-N(1) | -0.51(17)   |
| C(3)-C(4)-C(5)-N(2) | 179.13(10)  |
| C(6)-N(2)-C(5)-N(1) | -2.64(16)   |

|                       |             |
|-----------------------|-------------|
| C(6)-N(2)-C(5)-C(4)   | 177.70(10)  |
| C(7)-N(3)-C(6)-N(2)   | -176.32(10) |
| C(5)-N(2)-C(6)-N(3)   | 179.54(10)  |
| C(11)-N(4)-C(7)-C(8)  | -1.27(17)   |
| C(11)-N(4)-C(7)-N(3)  | -177.86(10) |
| C(6)-N(3)-C(7)-N(4)   | -144.63(10) |
| C(6)-N(3)-C(7)-C(8)   | 38.79(15)   |
| N(4)-C(7)-C(8)-C(9)   | 1.60(18)    |
| N(3)-C(7)-C(8)-C(9)   | 177.93(11)  |
| C(7)-C(8)-C(9)-C(10)  | -0.74(19)   |
| C(8)-C(9)-C(10)-C(11) | -0.3(2)     |
| C(7)-N(4)-C(11)-C(10) | 0.11(19)    |
| C(9)-C(10)-C(11)-N(4) | 0.7(2)      |

---

Symmetry transformations used to generate equivalent atoms:

**Table S12. Hydrogen bonds for ap04t [ $\text{\AA}$  and  $^\circ$ ].**

---

| D-H...A             | d(D-H)    | d(H...A)  | d(D...A)   | $\angle(\text{DHA})$ |
|---------------------|-----------|-----------|------------|----------------------|
| N(2)-H(2N)...N(3)#1 | 0.850(14) | 2.173(15) | 3.0212(14) | 175.6(12)            |
| C(4)-H(4)...N(4)#1  | 0.919(13) | 2.475(14) | 3.3545(16) | 160.2(10)            |

---

Symmetry transformations used to generate equivalent atoms:

#1 -x,-y+1,-z+1
